# Supplementary figures and images for: PGK1 promotes NSCLC progression by enhancing aerobic glycolysis and activating the AKT/ERK signaling pathway
Source: Research Square preprint supplement (doi:10.21203/rs.3.rs-7433808/v1), 2025-10-15

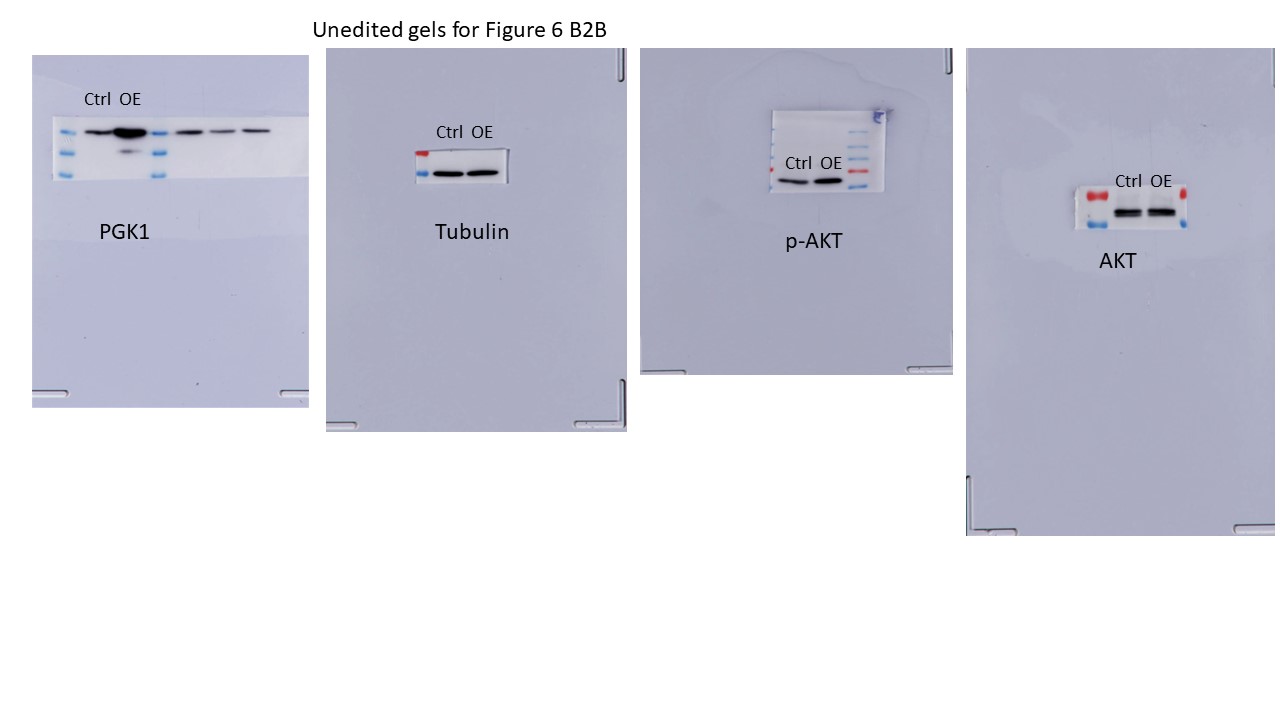


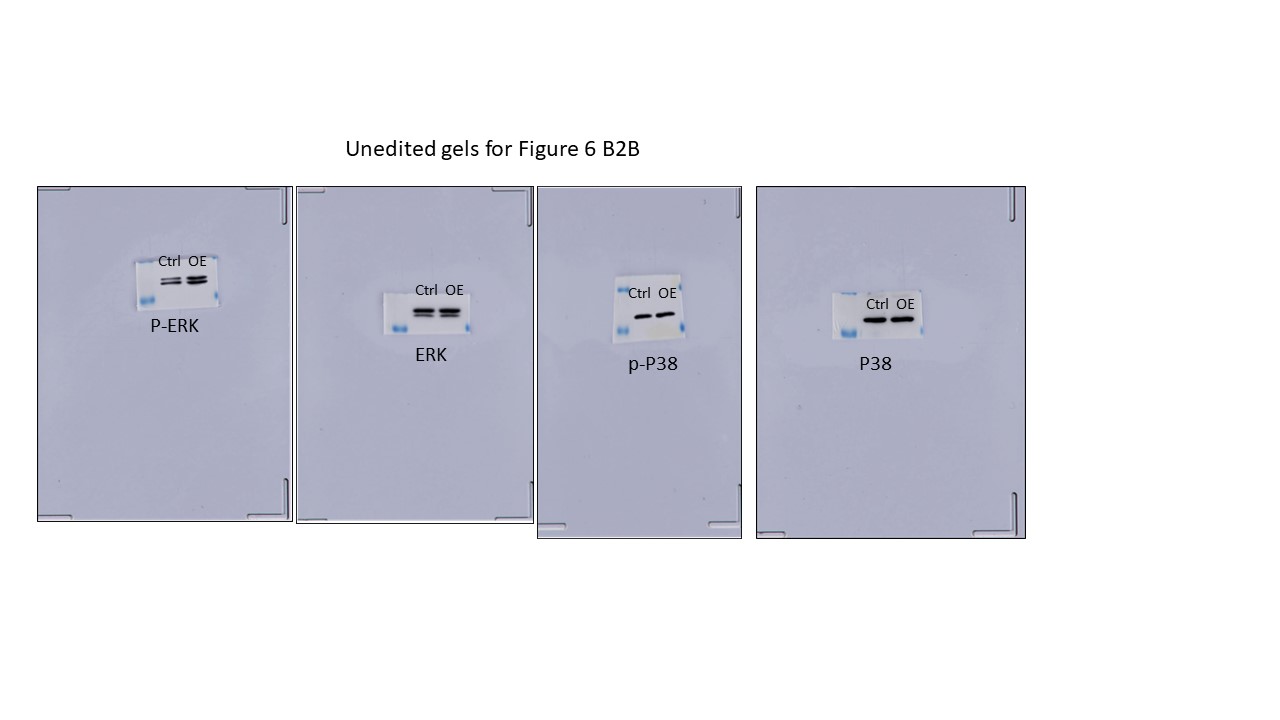


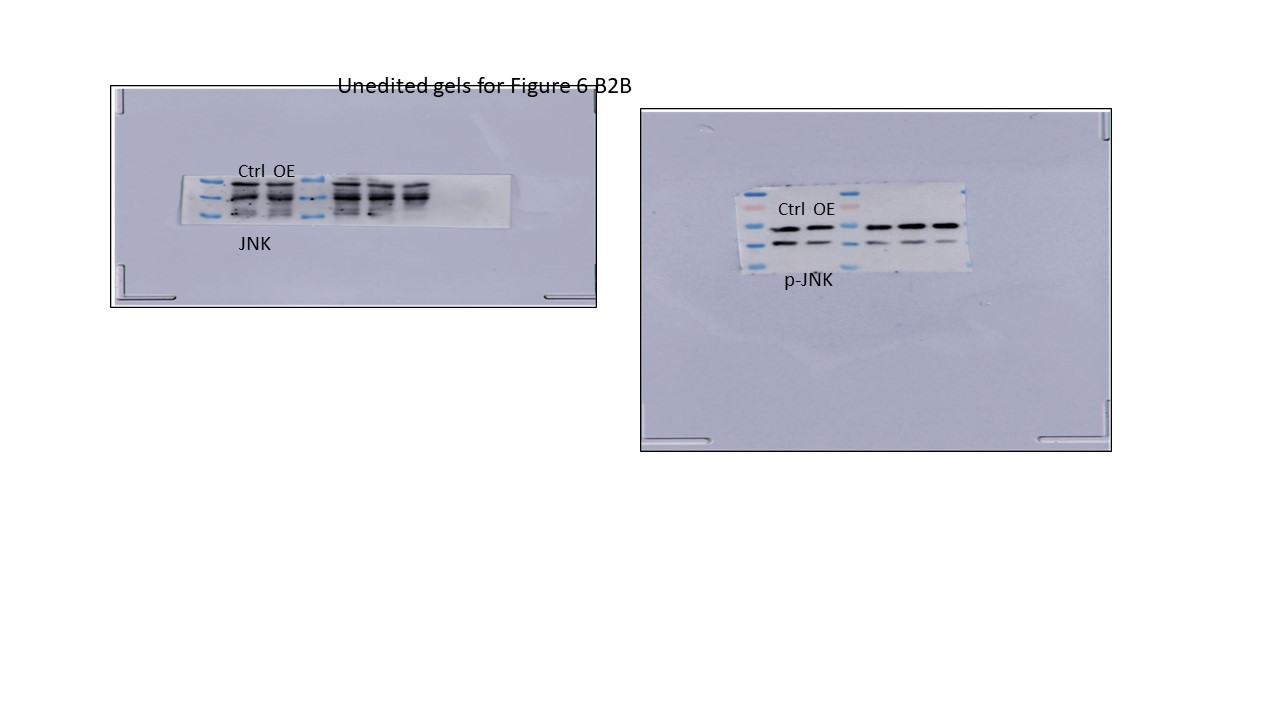


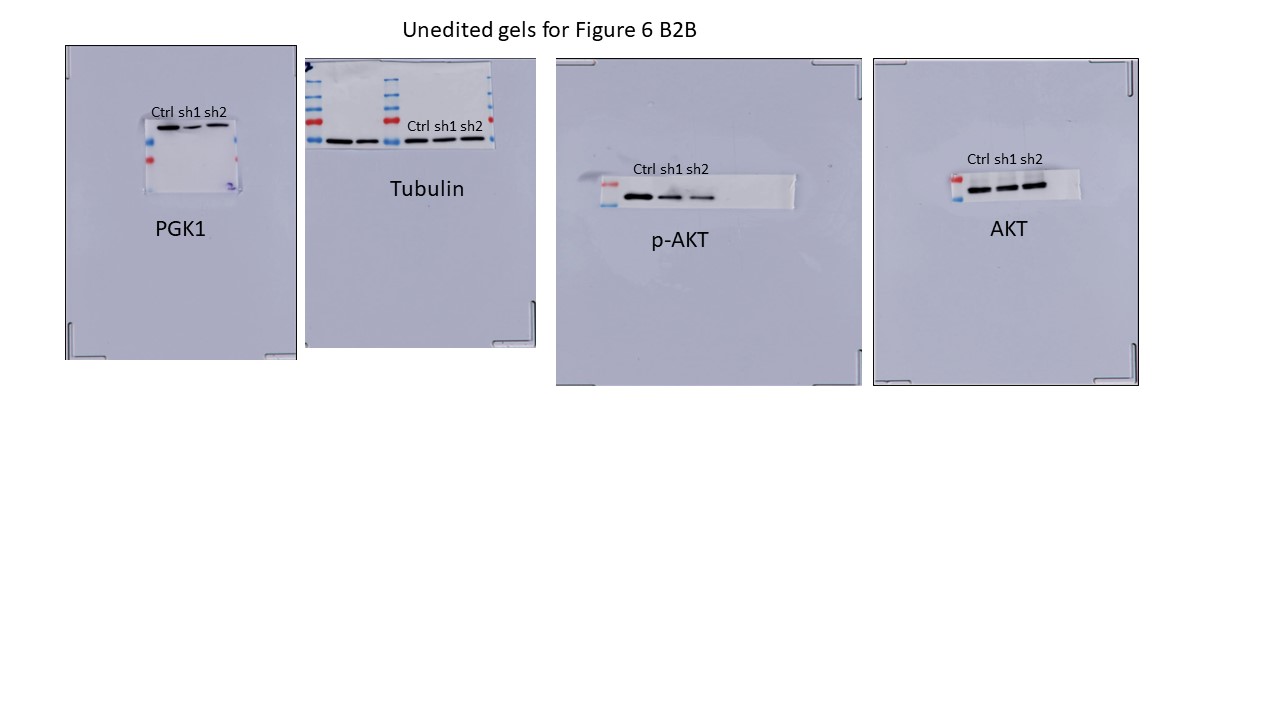


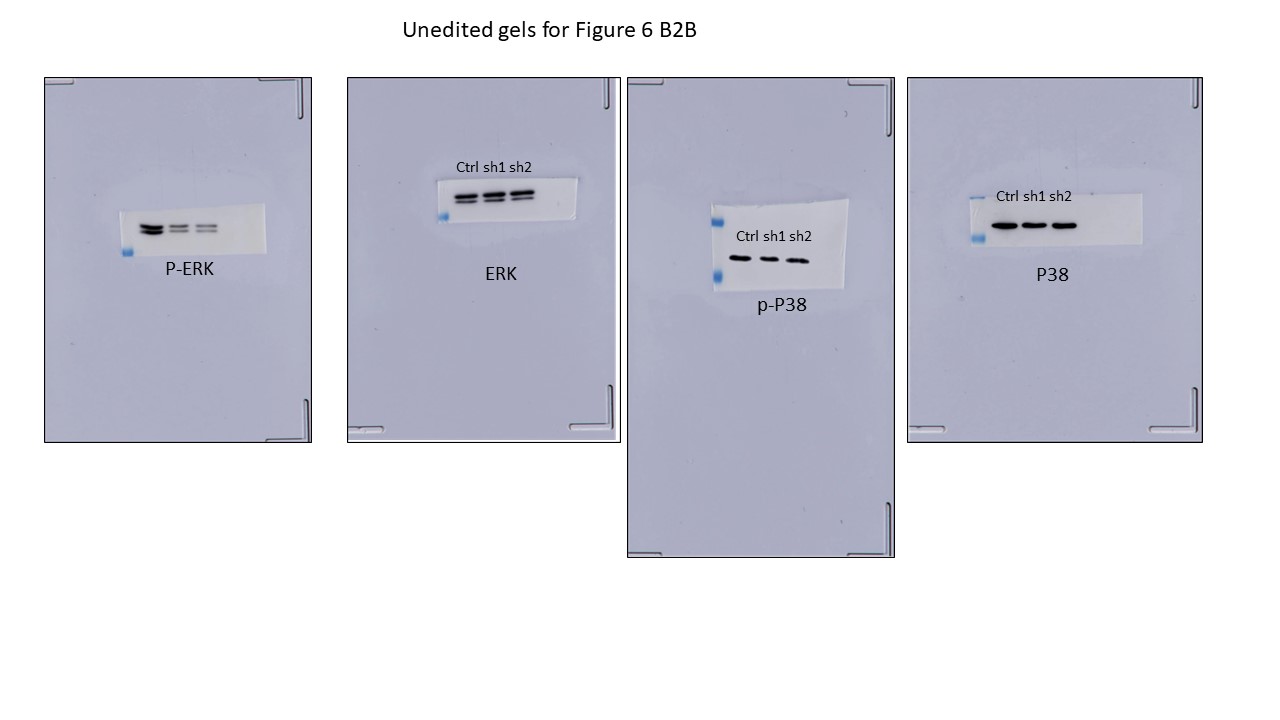


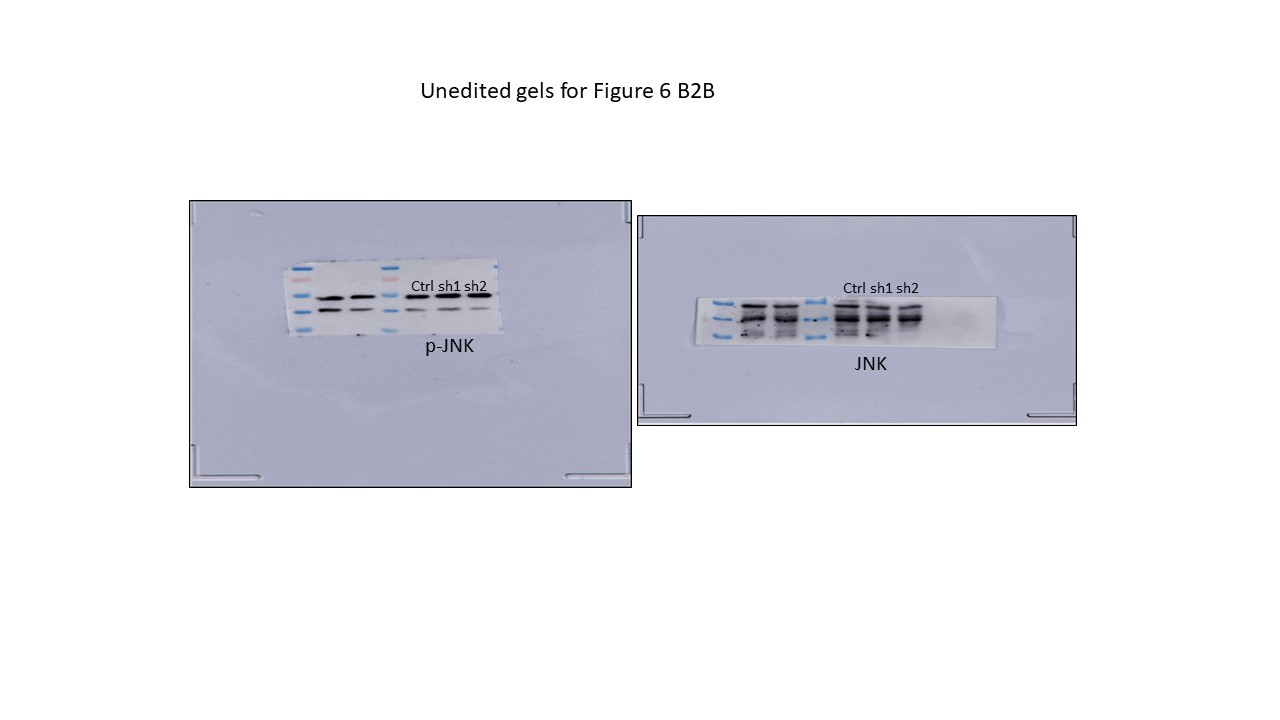


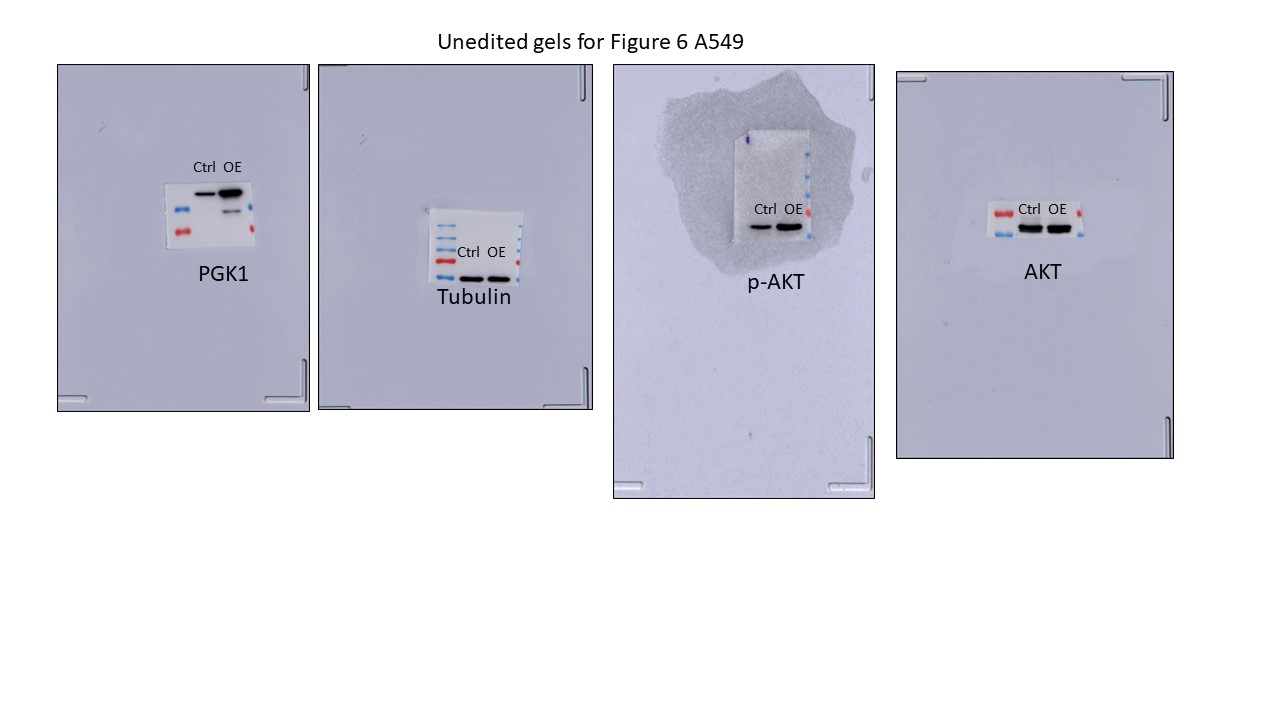


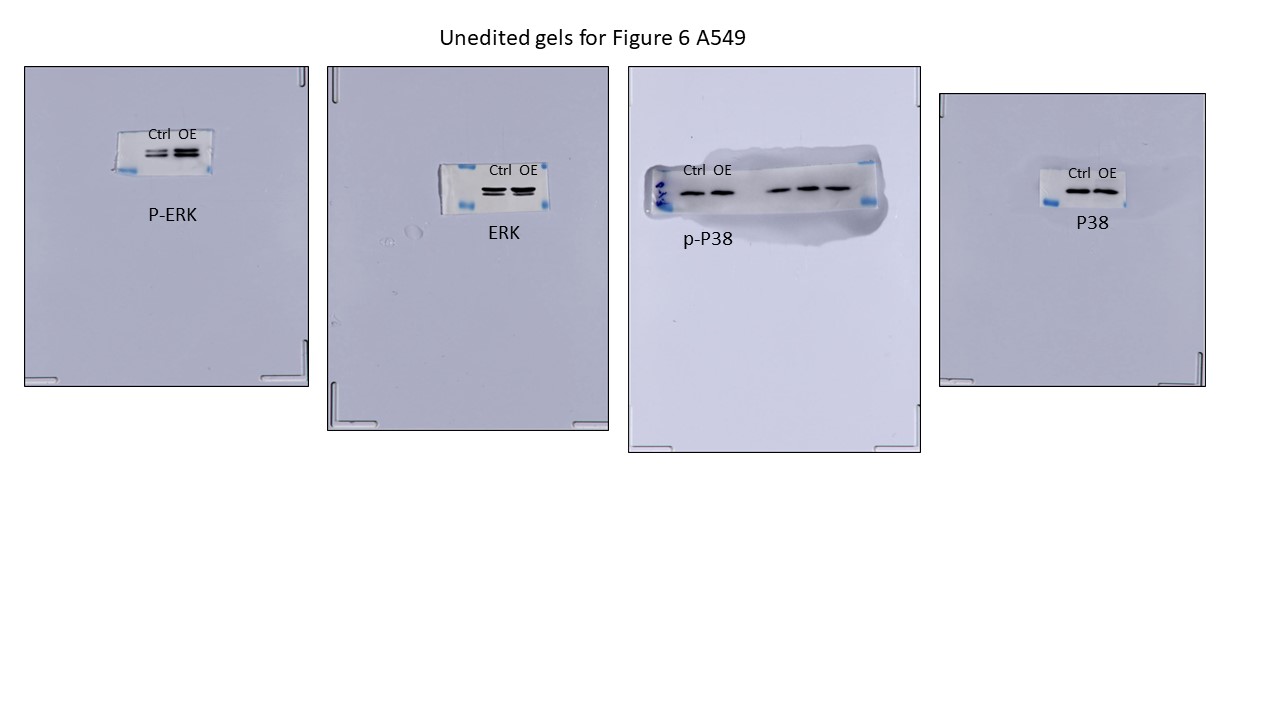


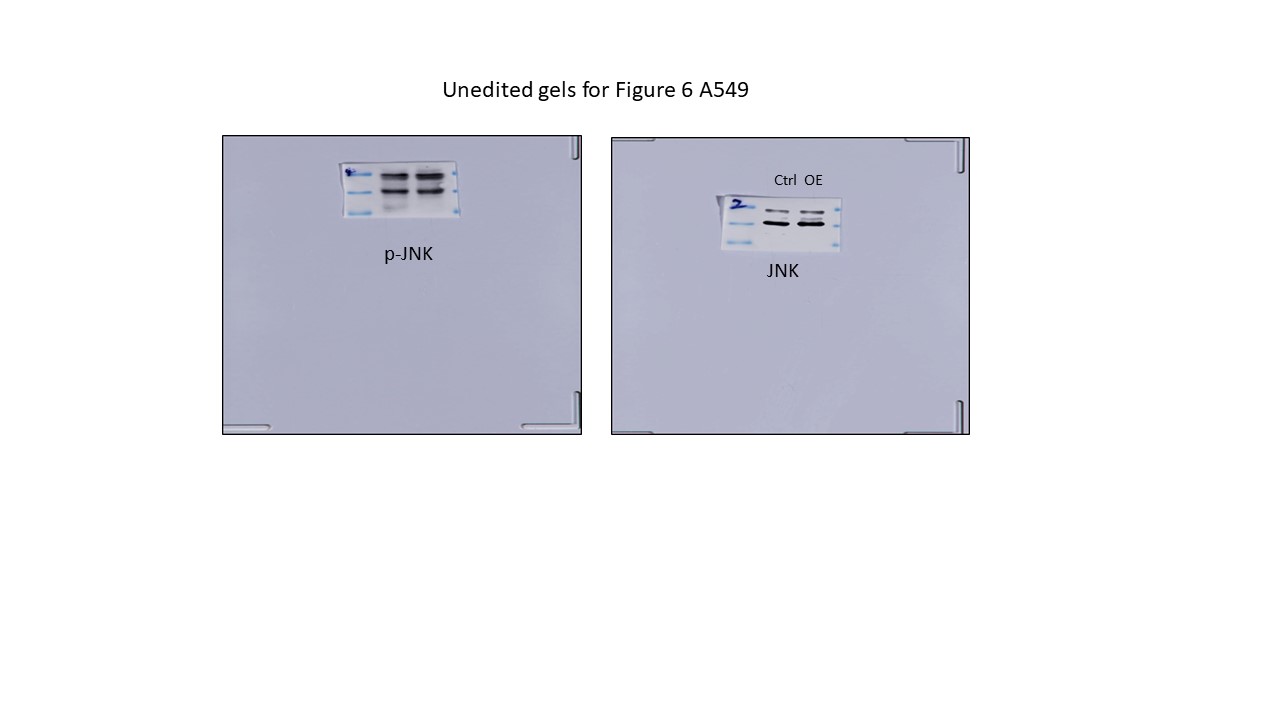


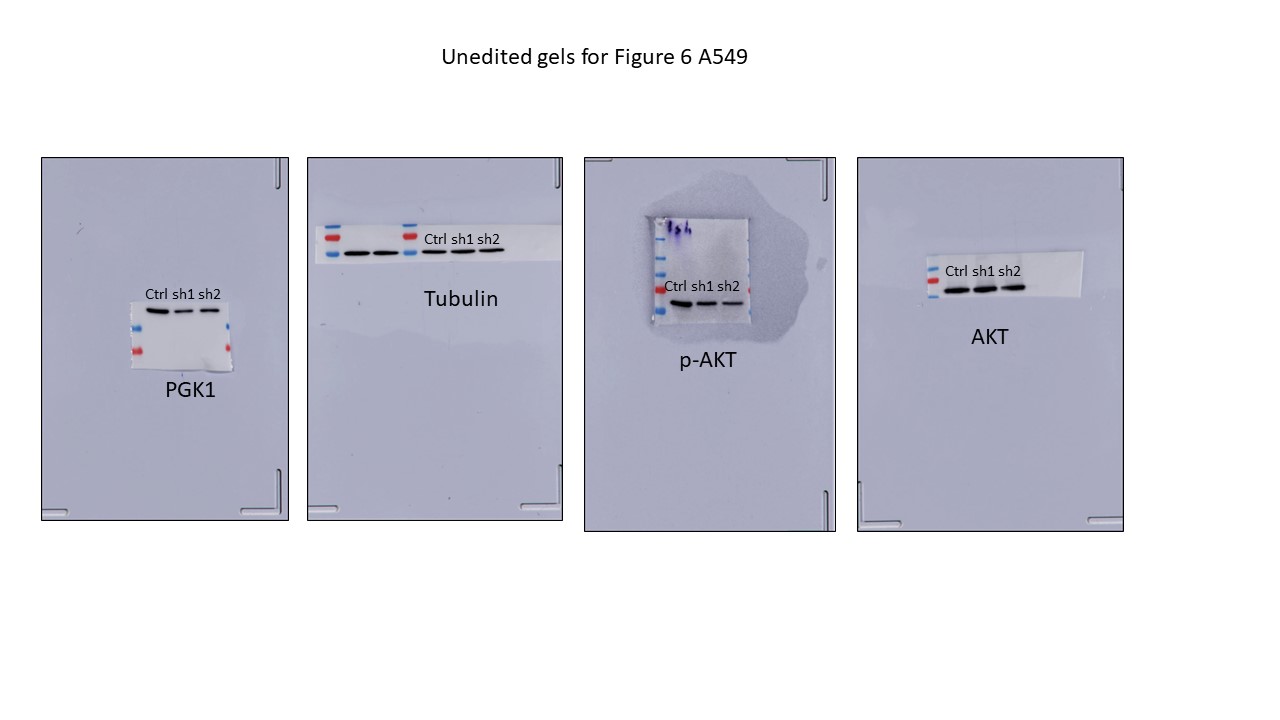


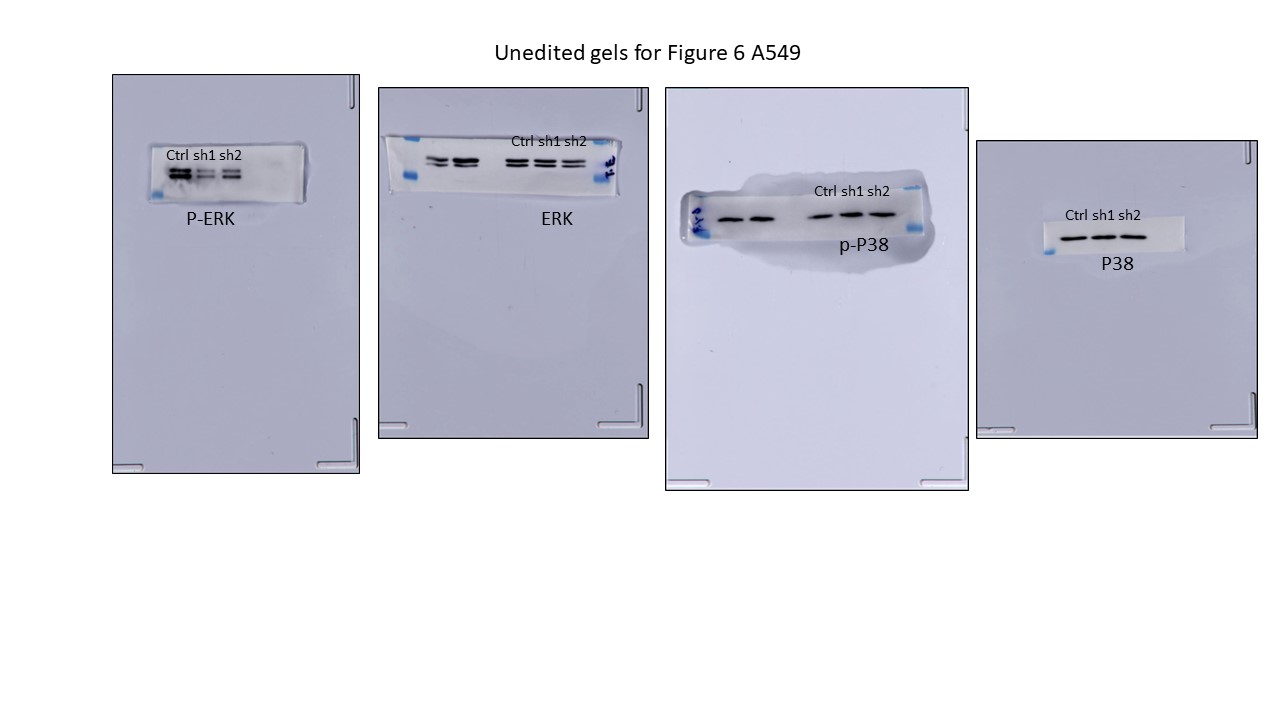


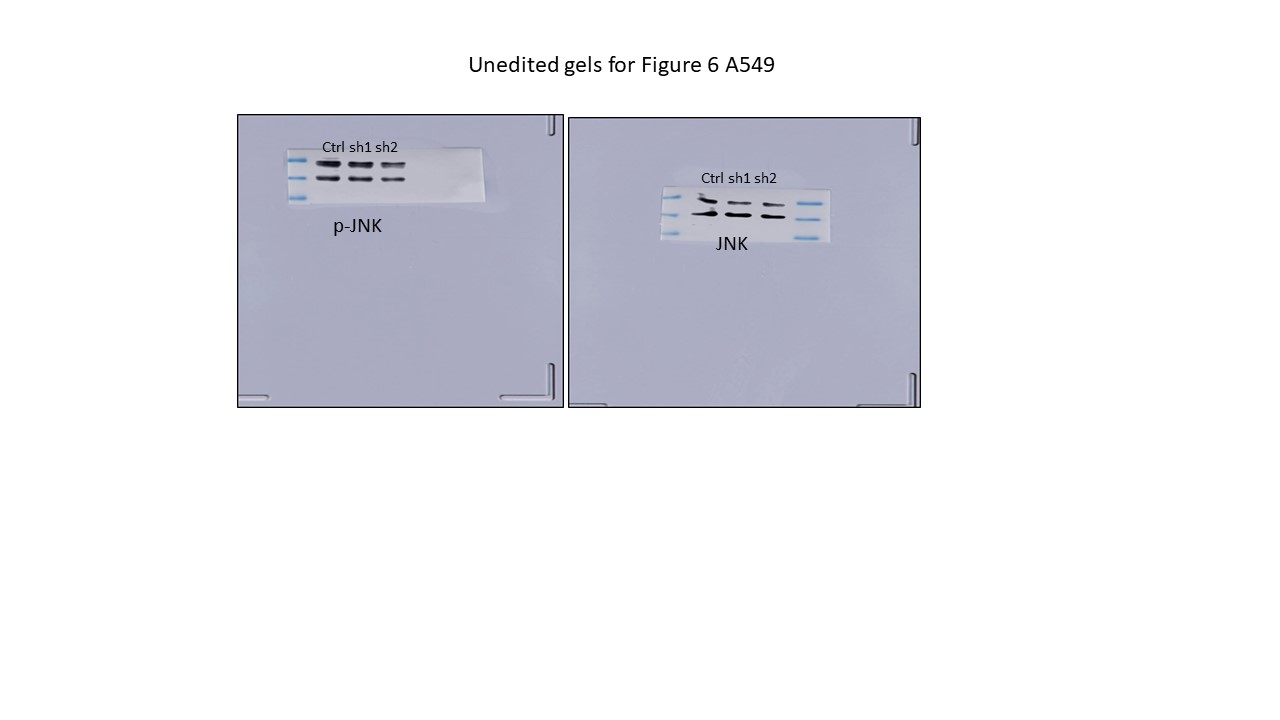


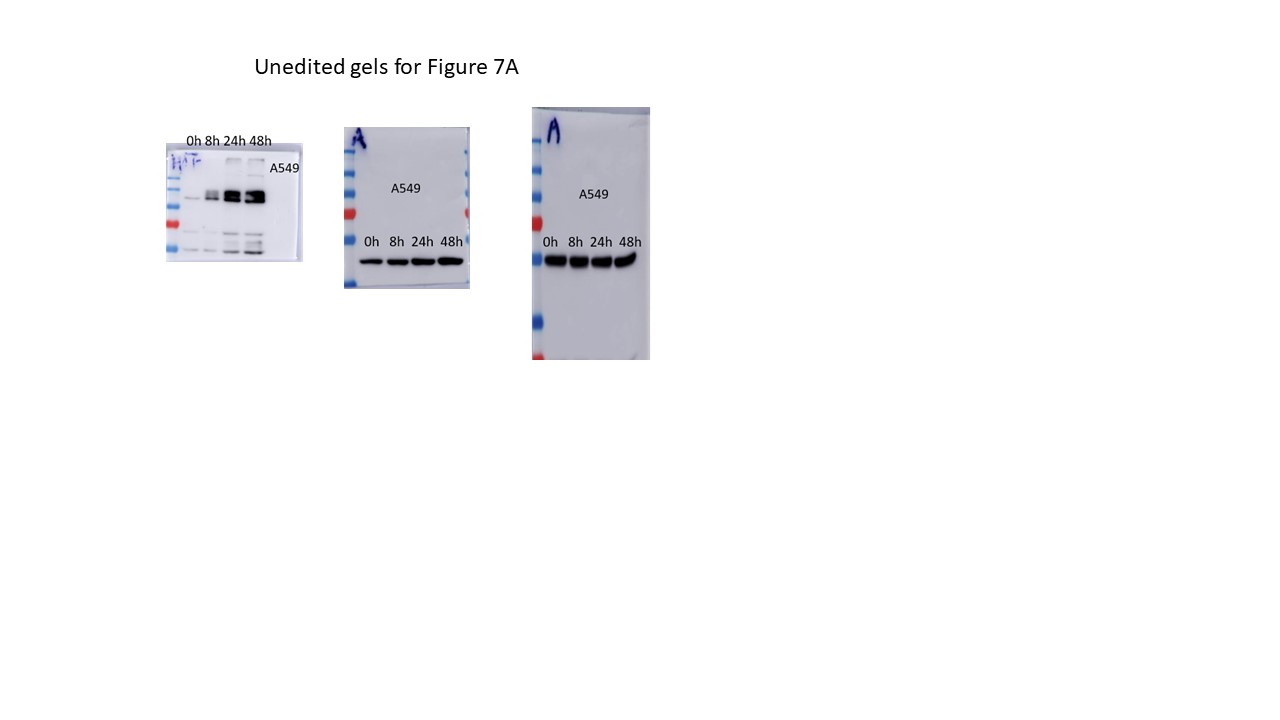


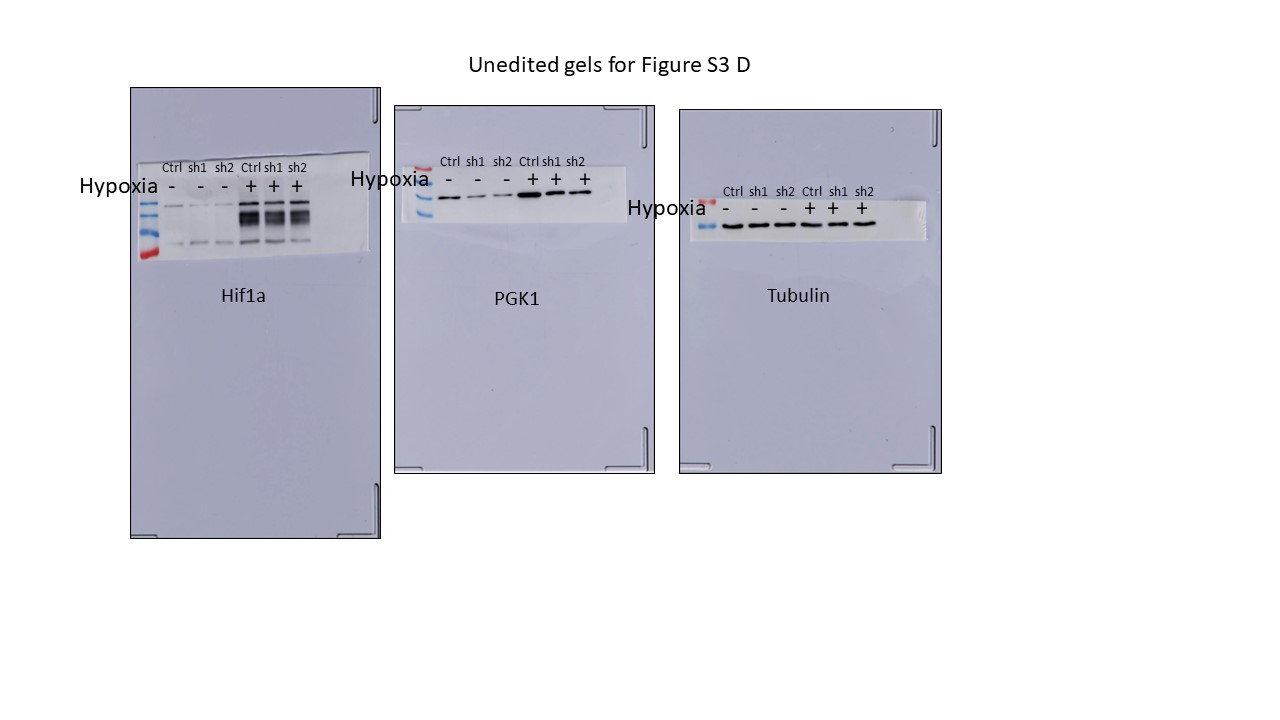


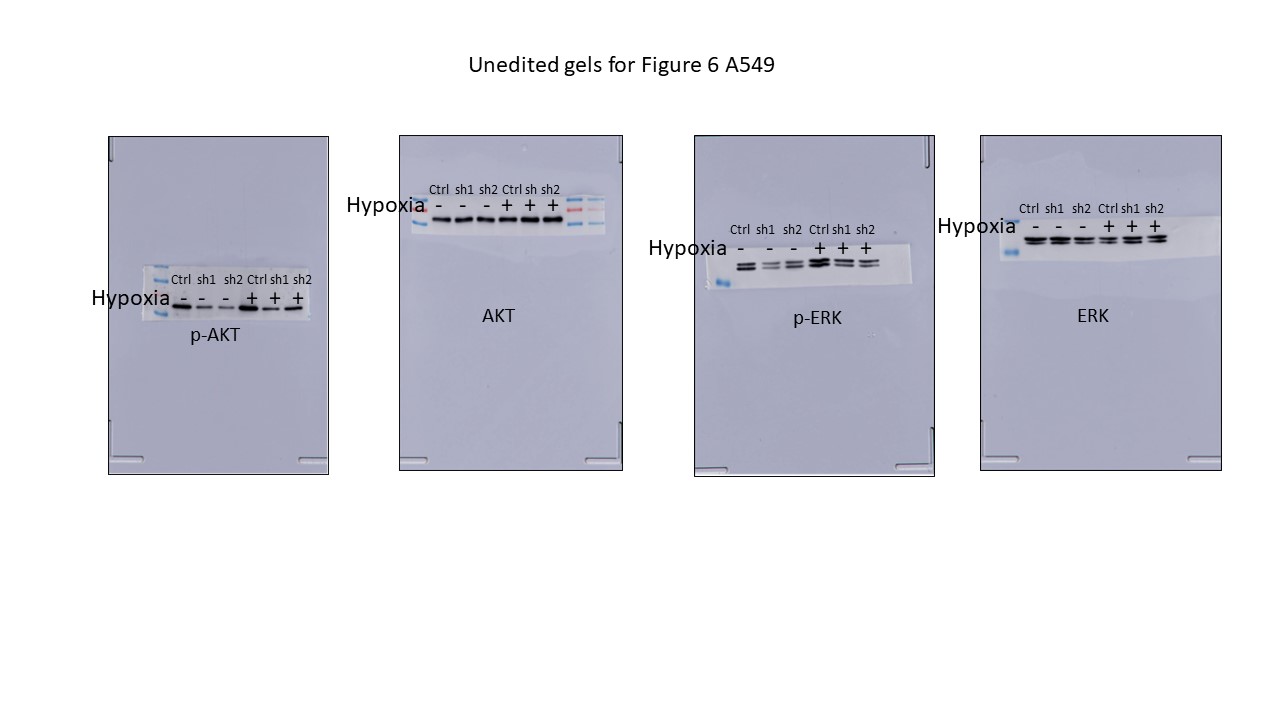

Supplement: Supplementary file 1 [file 3088412b70cfed20765c4b7e.docx]
